# Supplementary material for: Synergizing strong metal-support interactions and spatial confinement boosts dynamics of atomic nickel for hydrogenations
Source: Research Square preprint supplement (doi:10.21203/rs.3.rs-126470/v1), 2020-12-29
Supplement: Supplementary file 2 [file 7b2871536a9ced989c31c5f4.docx]

A movie of hydrogenation of acetylene on Ni1Cu2/g-C3N4 showing the dynamic structure change by breaking the interfacial Ni-N/C bonds upon acetylene adsorption and making these bonds upon ethylene desorption.
